# Supplementary material for: H3K27me3 Profiling of the Endosperm Implies Exclusion of Polycomb Group Protein Targeting by DNA Methylation
Source: PubMed Central journal article supplement (PMC2951372; doi:10.1371/journal.pgen.1001152), 2010-10-07

Figure S1

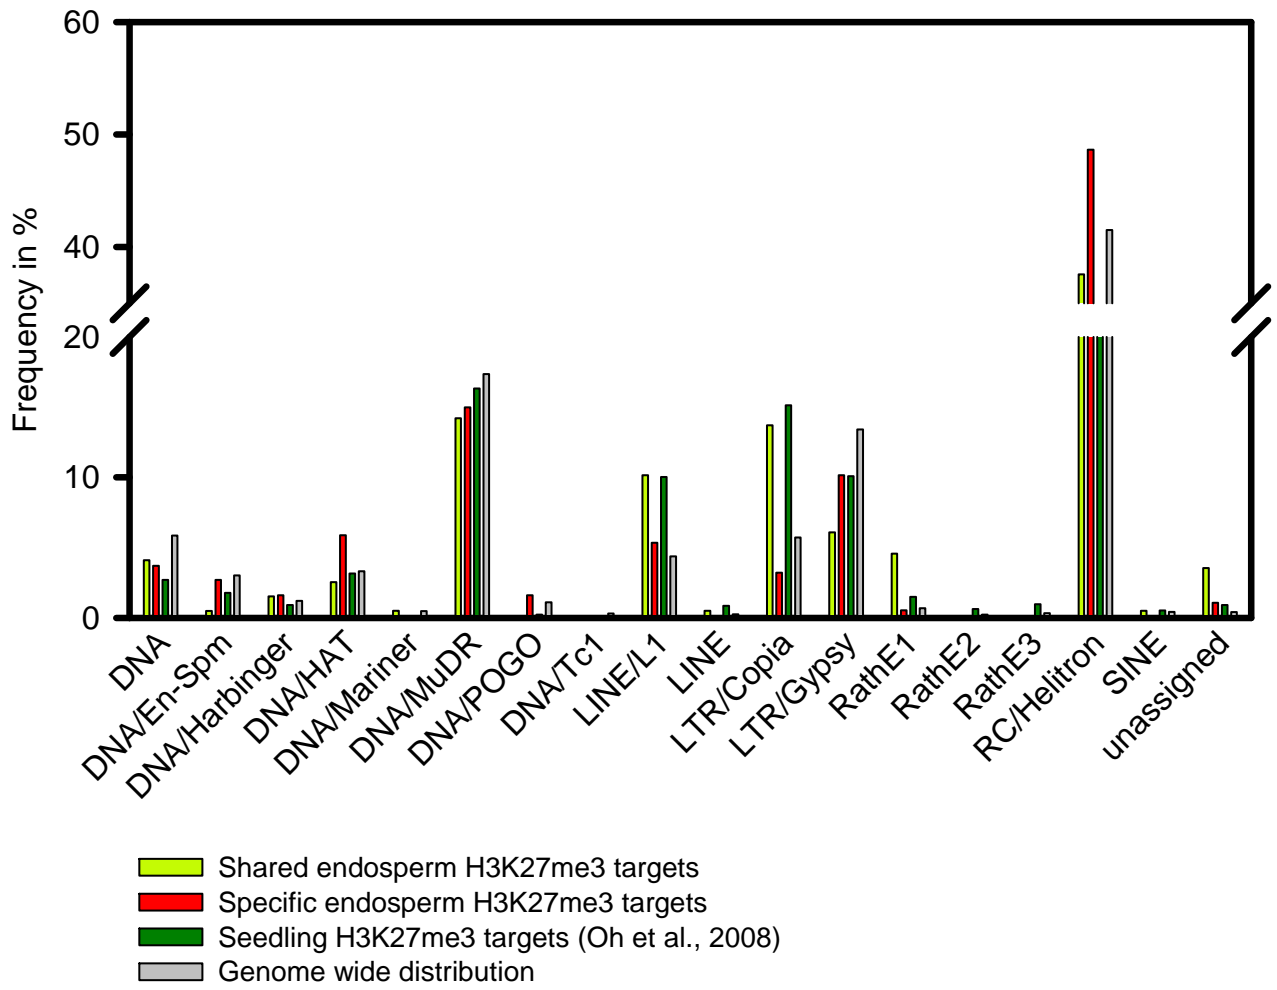

Supplement: pgen.1001152.s001.pdf [file pgen.1001152.s001.pdf]
