# Supplementary material for: H3K27me3 Profiling of the Endosperm Implies Exclusion of Polycomb Group Protein Targeting by DNA Methylation
Source: PubMed Central journal article supplement (PMC2951372; doi:10.1371/journal.pgen.1001152), 2010-10-07
Supplement: pgen.1001152.s006.pdf [file pgen.1001152.s006.pdf]

**Table S2. MADS-box transcription factors among shared H3K27me3 target genes.**

| <b>Locus</b> | <b>Description</b> | <b>Type</b> |
|--------------|--------------------|-------------|
| AT5G65070    | MAF4               | MIKC        |
| AT3G58780    | SHATTERPROOF 1     | MIKC        |
| AT1G26310    | CAULIFLOWER        | MIKC        |
| AT2G45650    | AGL6               | MIKC        |
| AT5G60910    | AGL8               | MIKC        |
| AT4G11880    | AGL14              | MIKC        |
| AT5G13790    | AGL15              | MIKC        |
| AT2G22630    | AGL17              | MIKC        |
| AT4G37940    | AGL21              | MIKC        |
| AT4G24540    | AGL24              | MIKC        |
| AT5G51860    | AGL72              | MIKC        |
| AT1G65330    | PHERES1            | M $\gamma$  |
| AT2G26880    | AGL41              | M $\gamma$  |
| AT5G49490    | AGL83              | M $\alpha$  |
| AT1G17310    | AGL100             | M $\alpha$  |
| AT3G18650    | AGL103             | M $\beta$   |
